# Supplementary material for: Comparison of Antioxidant and Antiproliferative Effects of Various Forms of Garlic and Ramsons
Source: MDPI journal article supplement (doi:10.3390/molecules28186512), 2023-09-08
Supplement: s1 [file s1]

## Supplementary Material S1

UPLC-PDA-MS chromatograms of organosulfur compounds found in *A. sativum*. Numbers of compounds as given in Table 1.

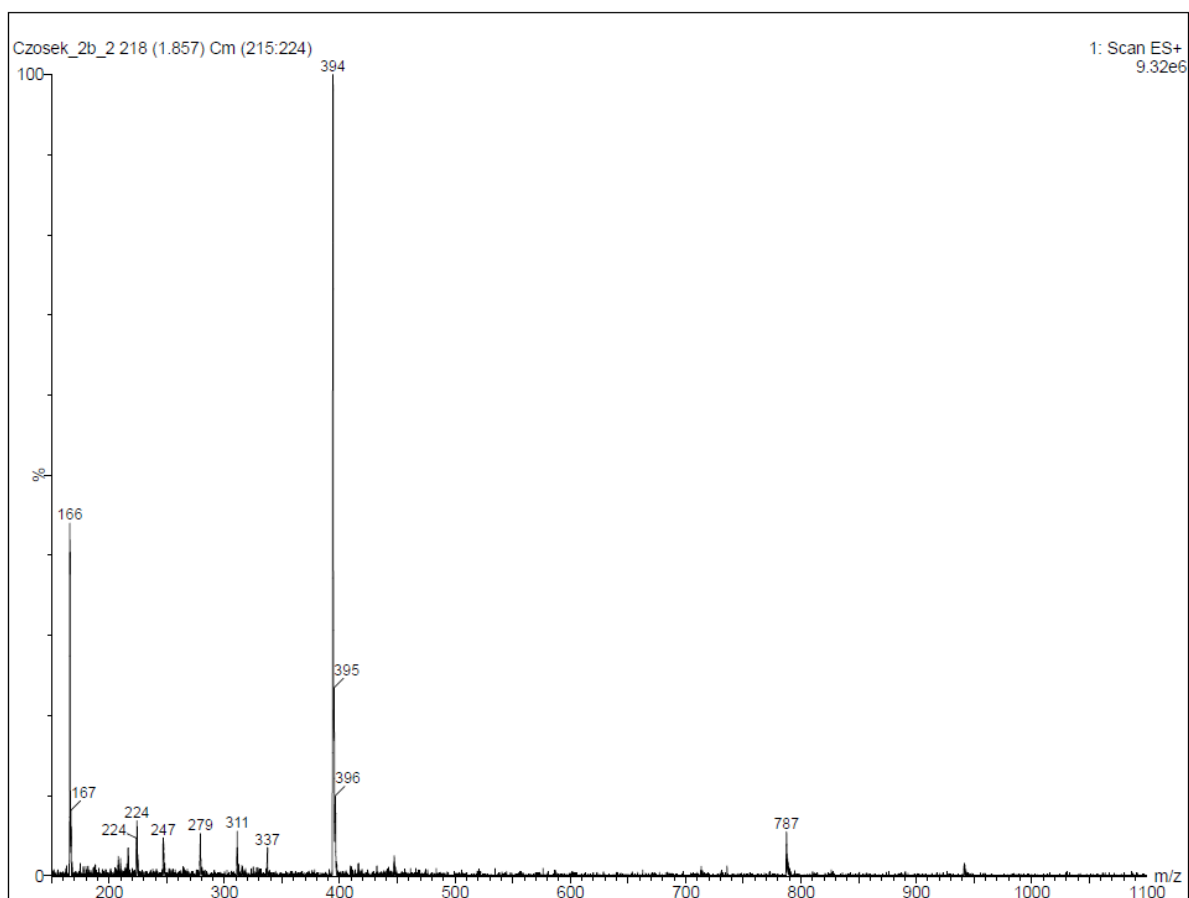

Compound 1

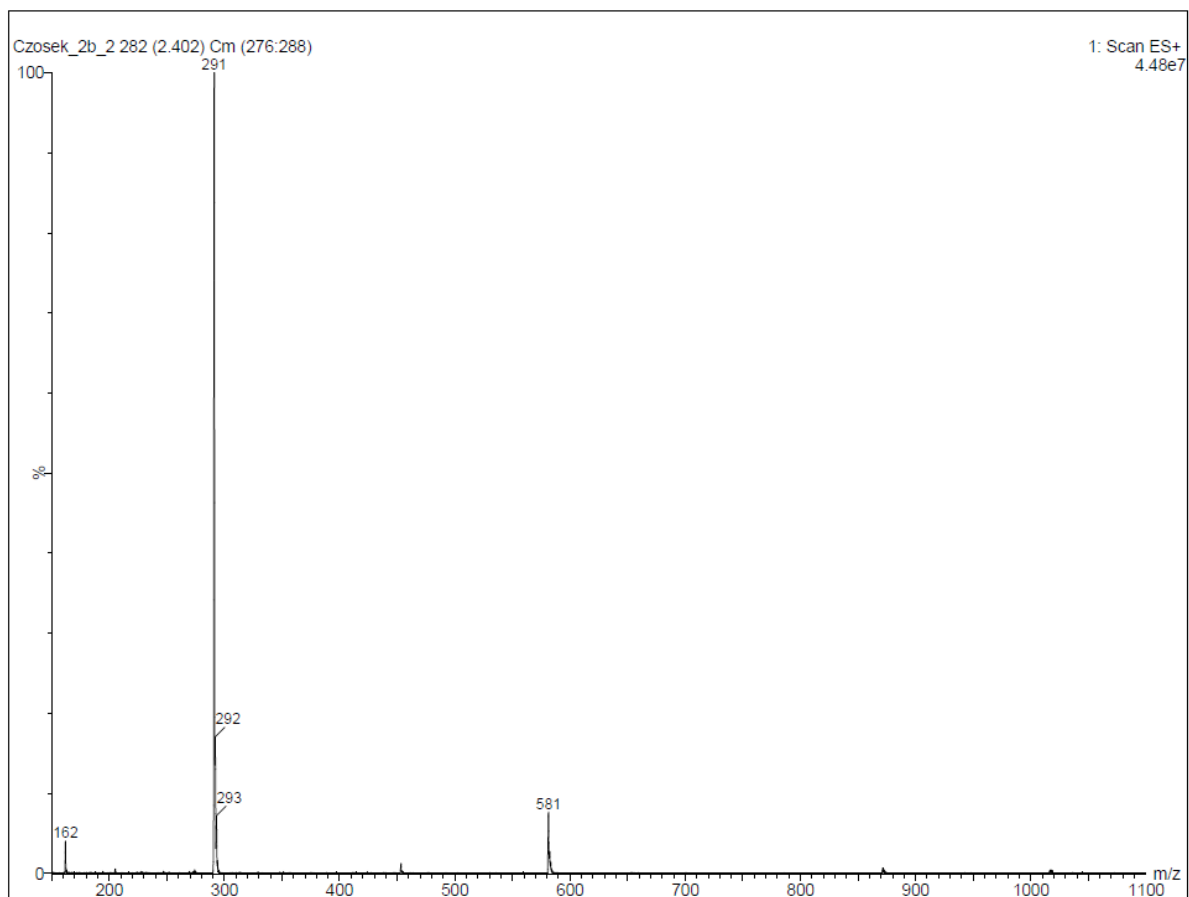

Compound 2

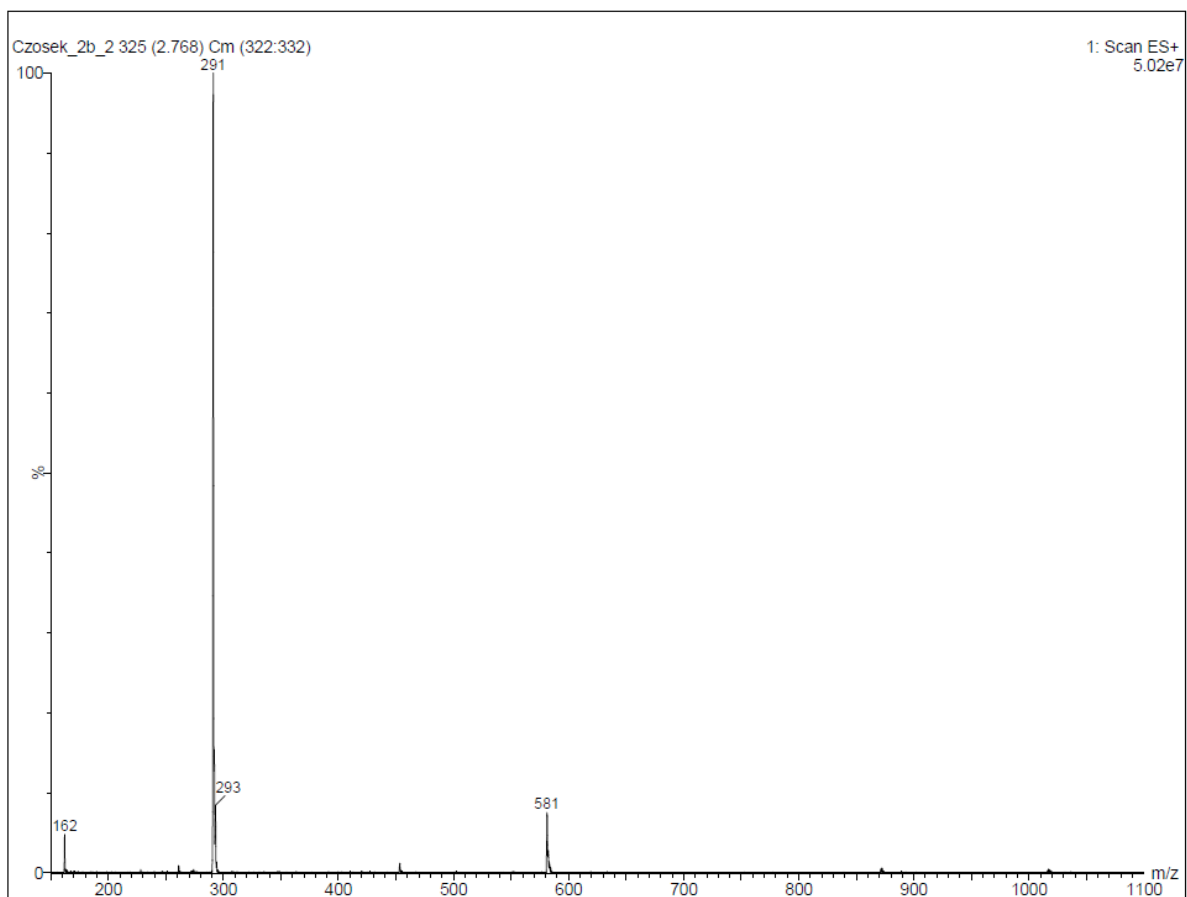

Compound 3

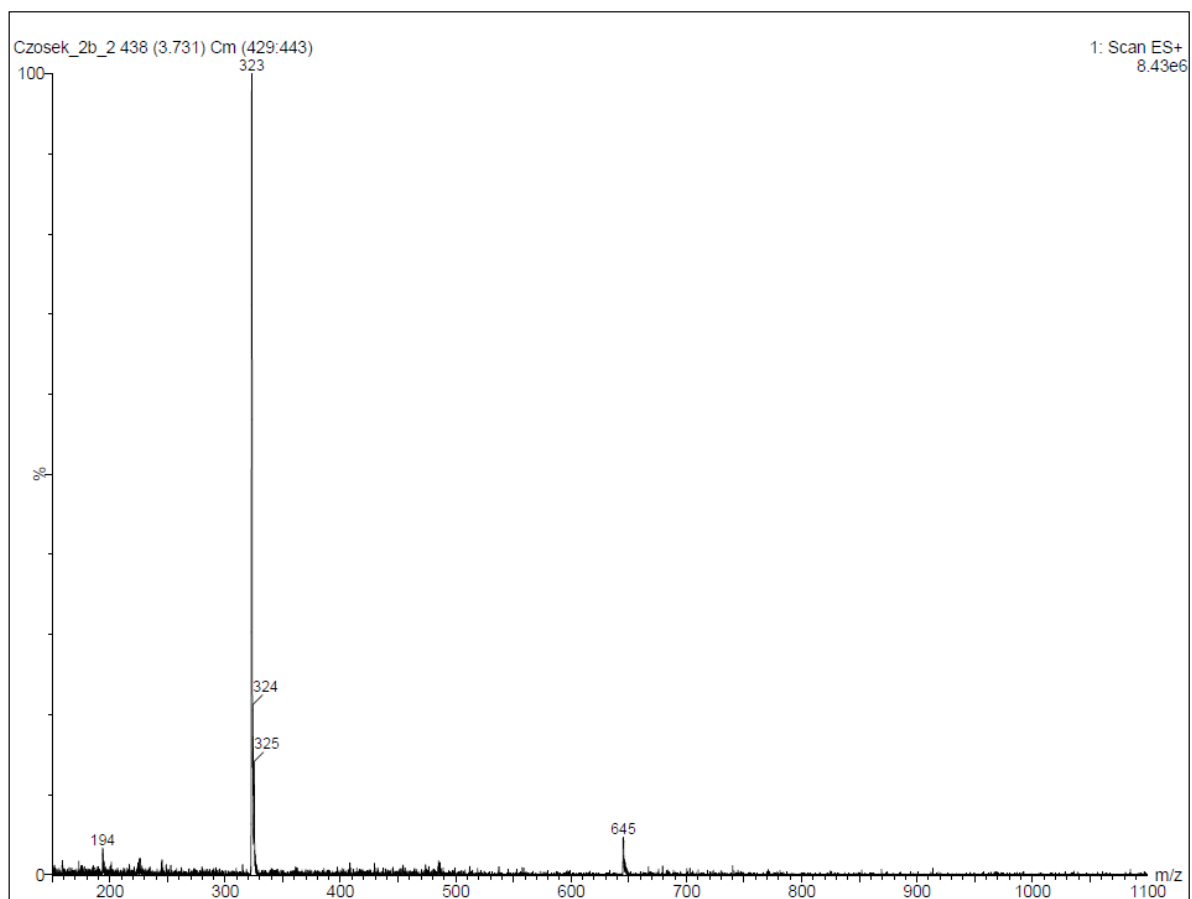

Compound 4

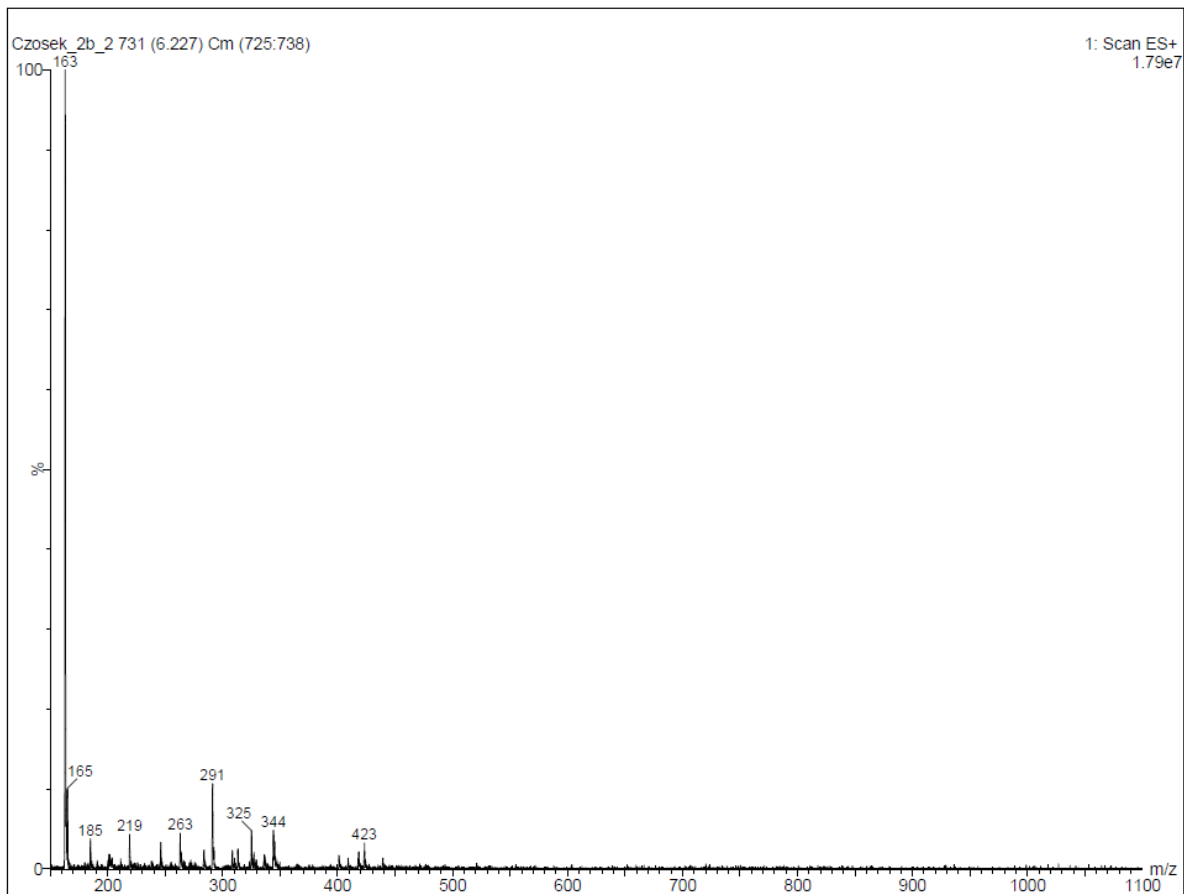

Compound 5

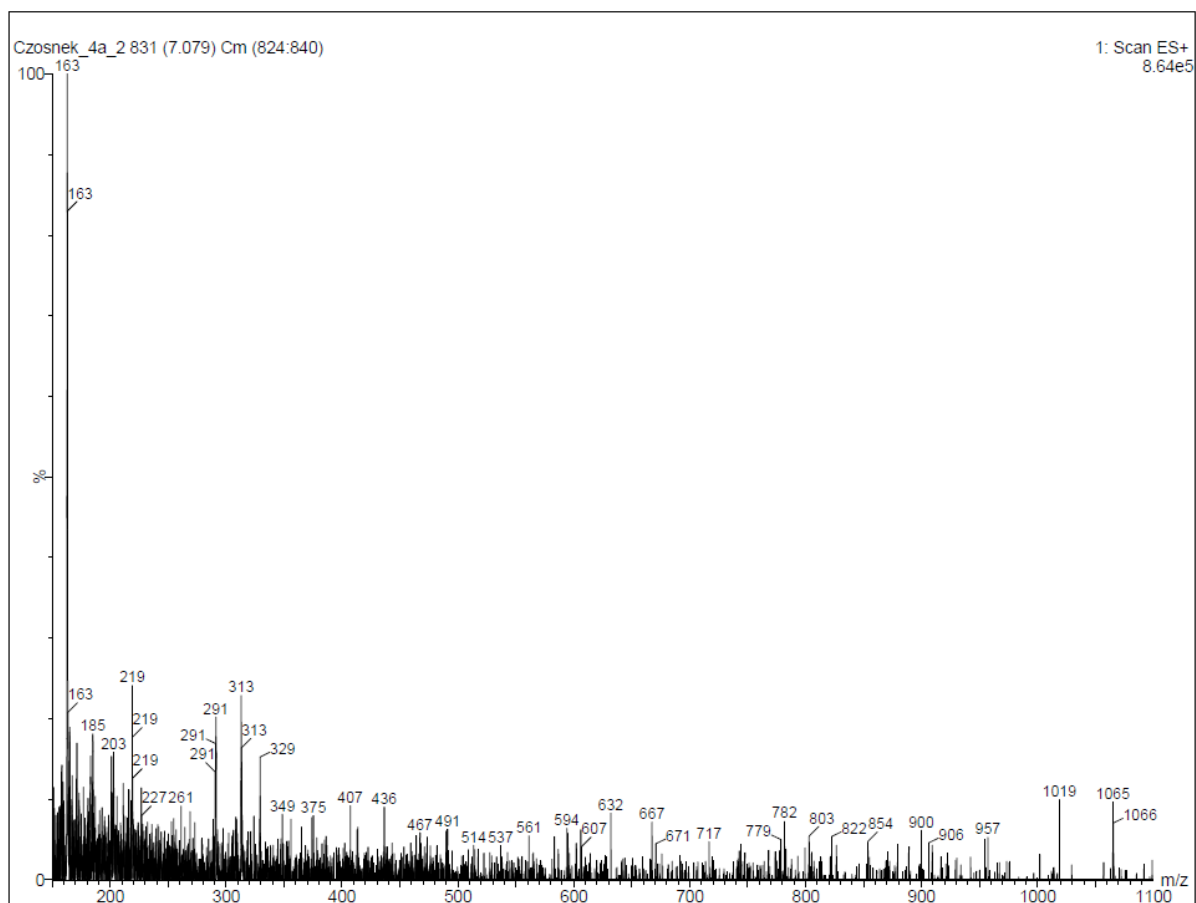

Compound 6

## Supplementary Material S2

UPLC-PDA-MS-MS spectra of phenolic compounds found in *A. ursinum*. Numbers of compounds as given in Table 3.

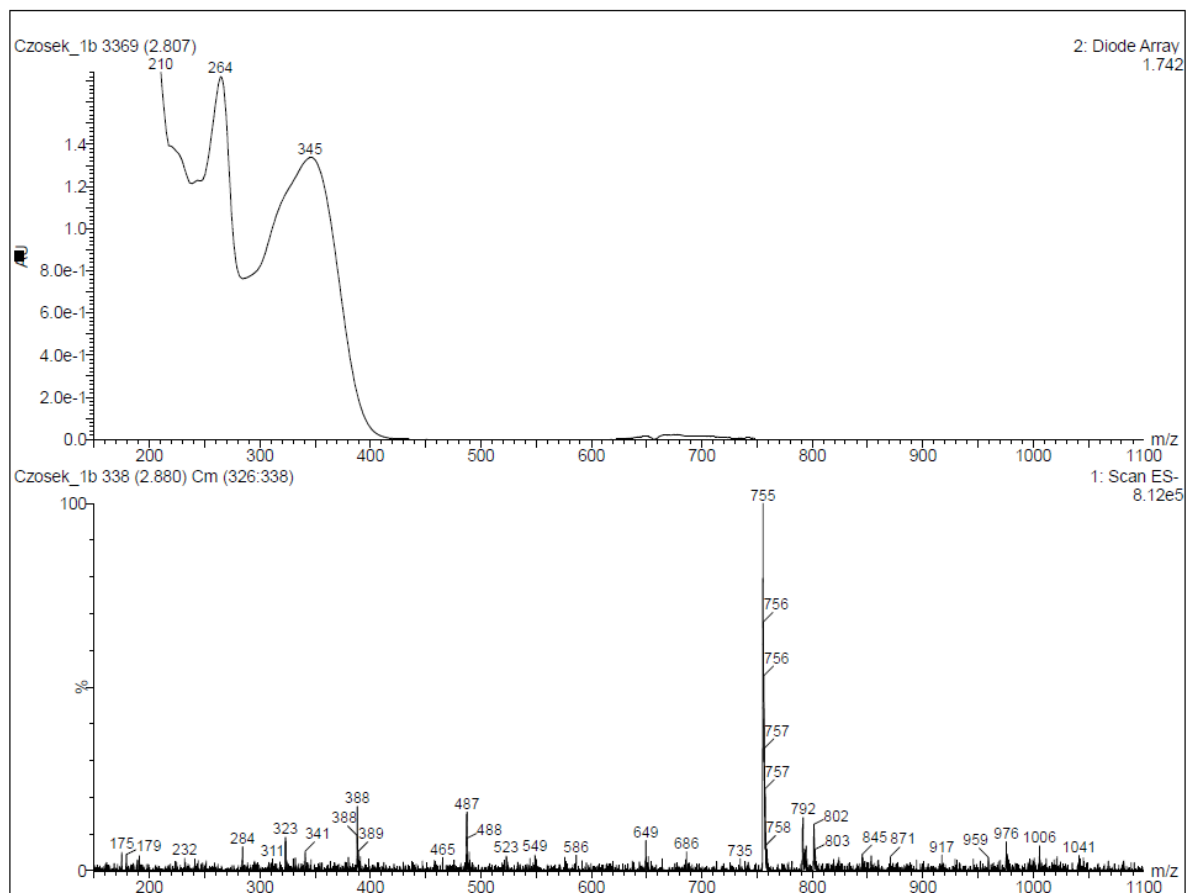

Compound 1

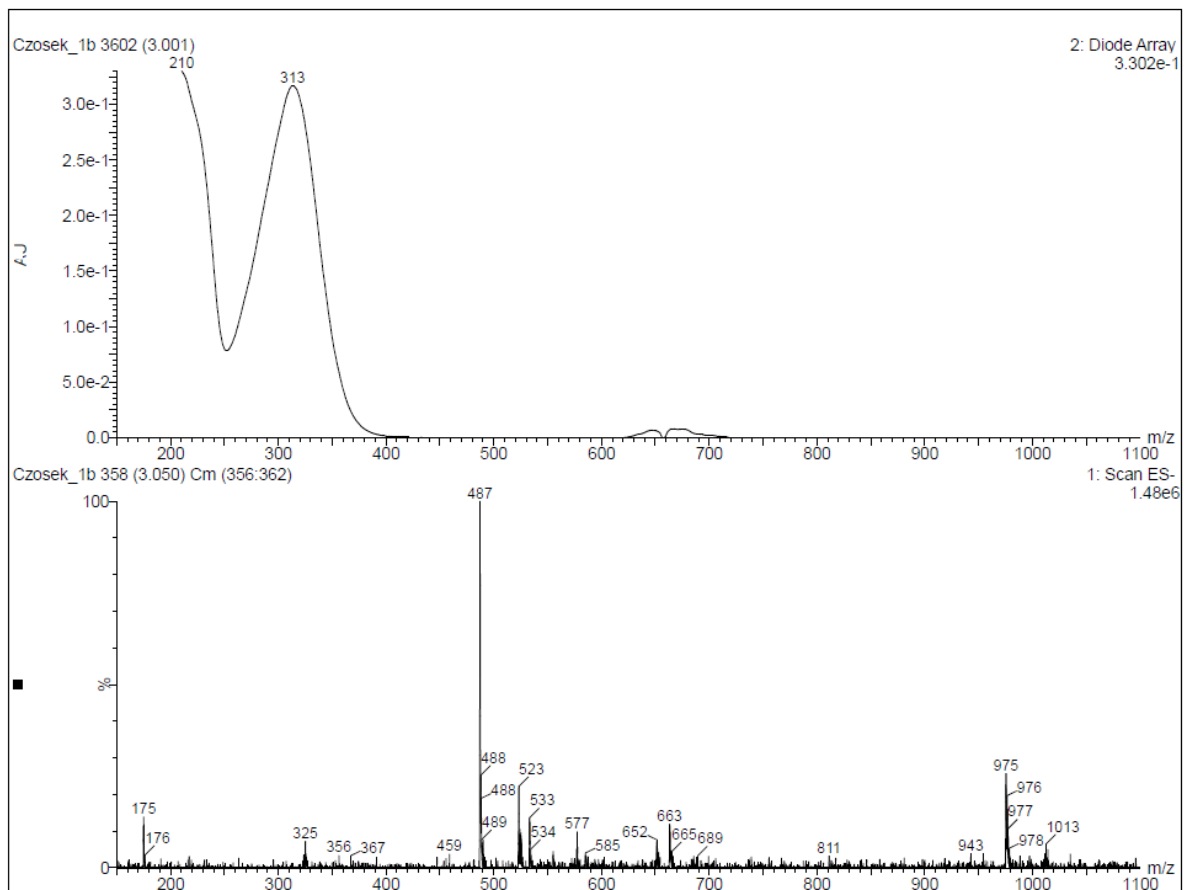

Compound 2

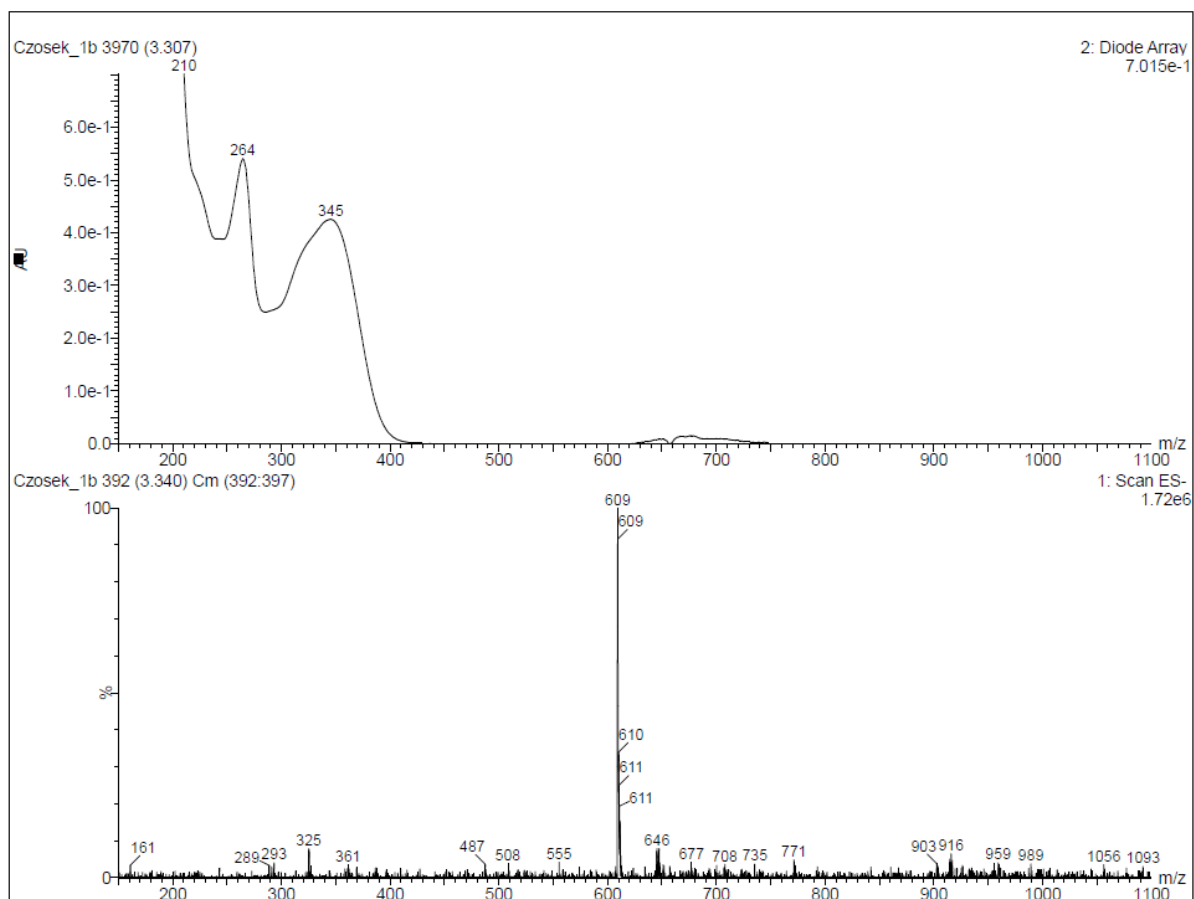

Compound 3

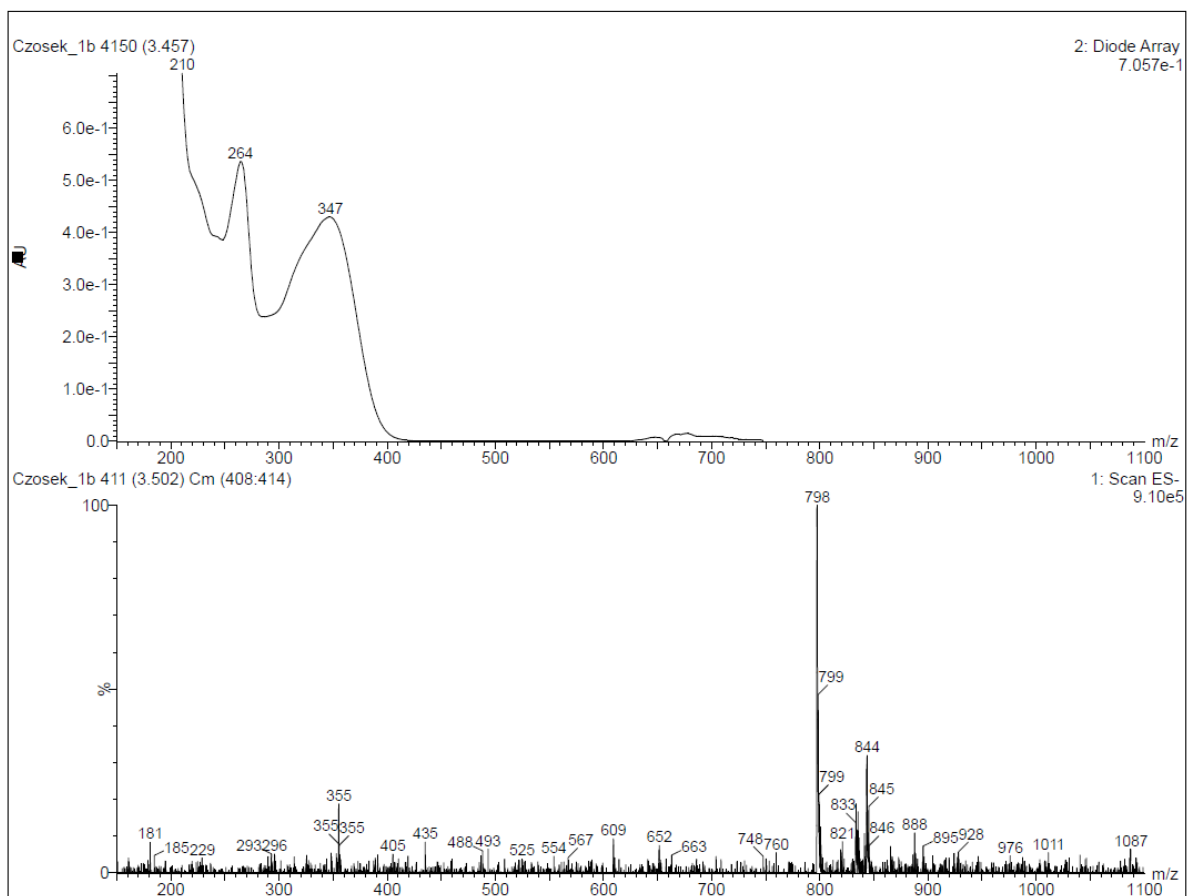

Compound 4

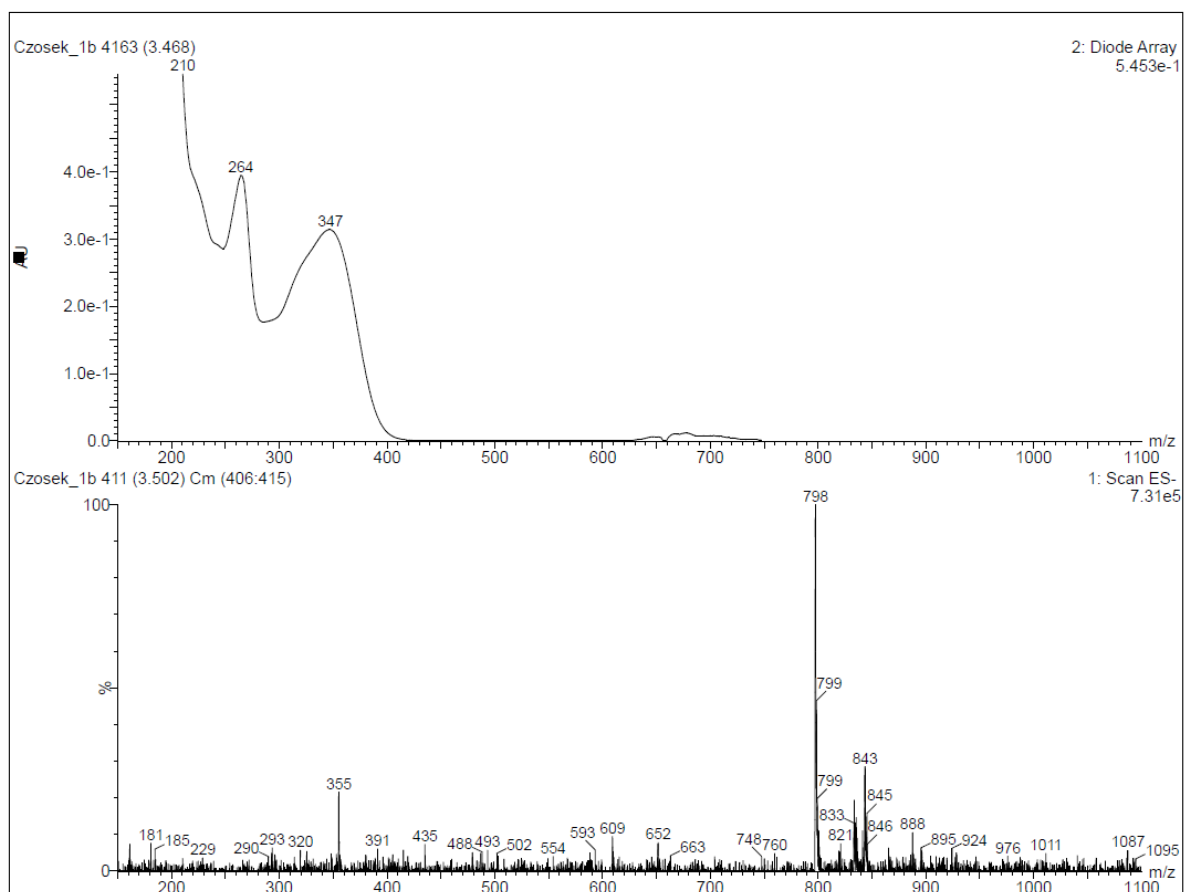

Compound 5

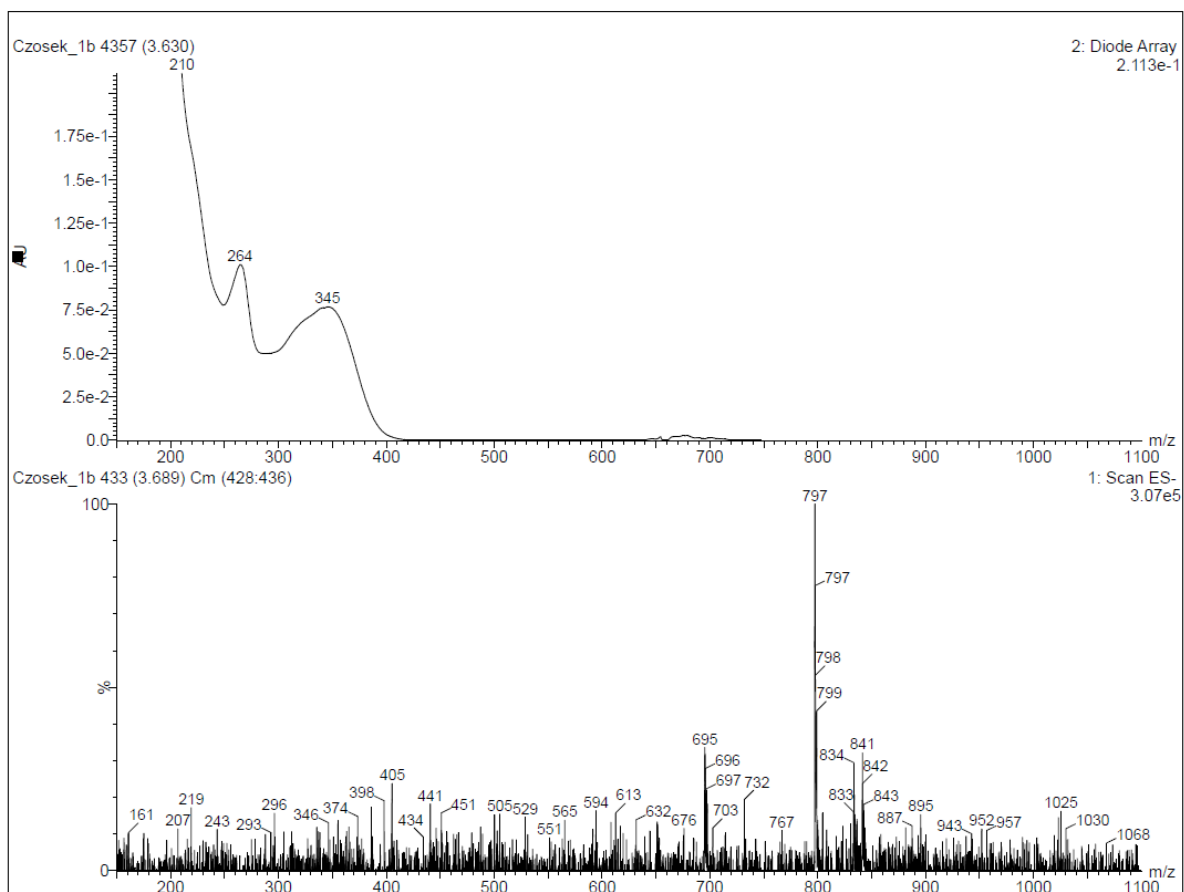

Compound 6

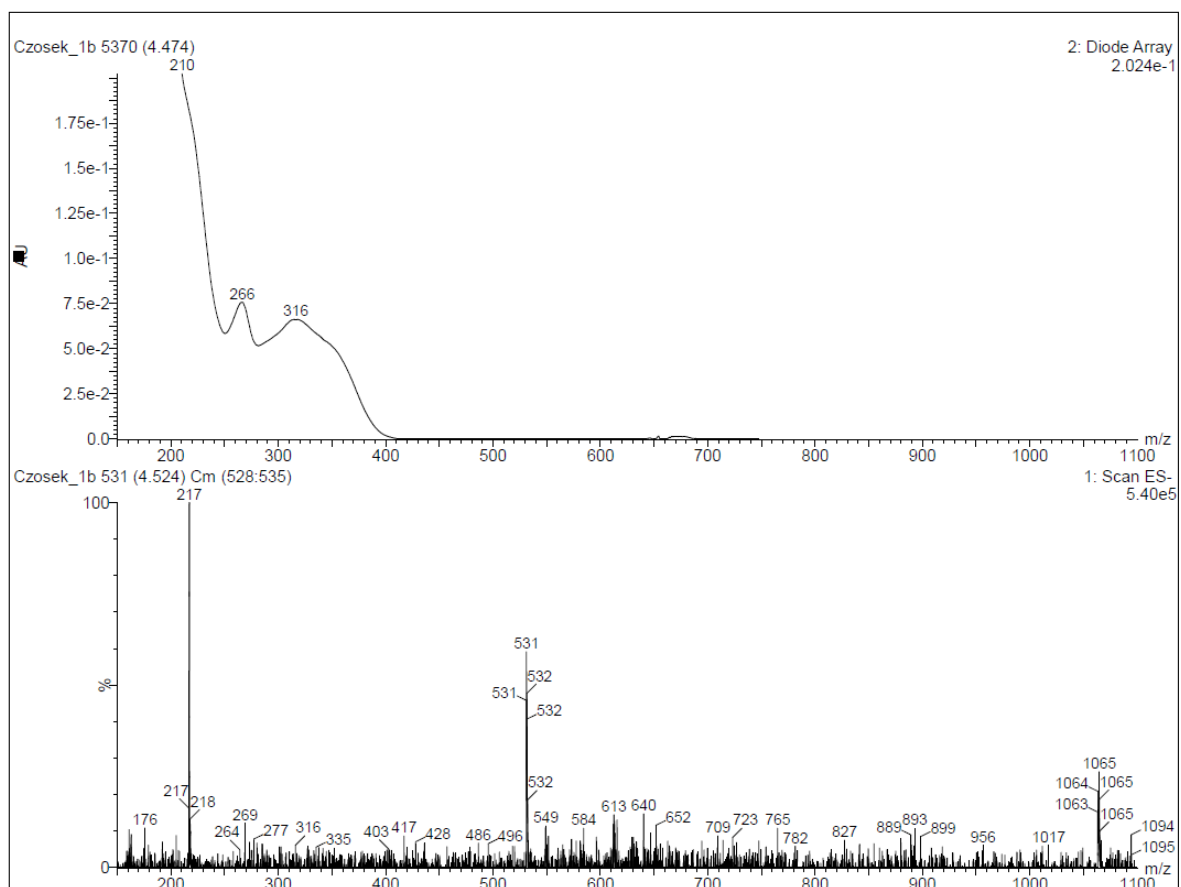

Compound 7

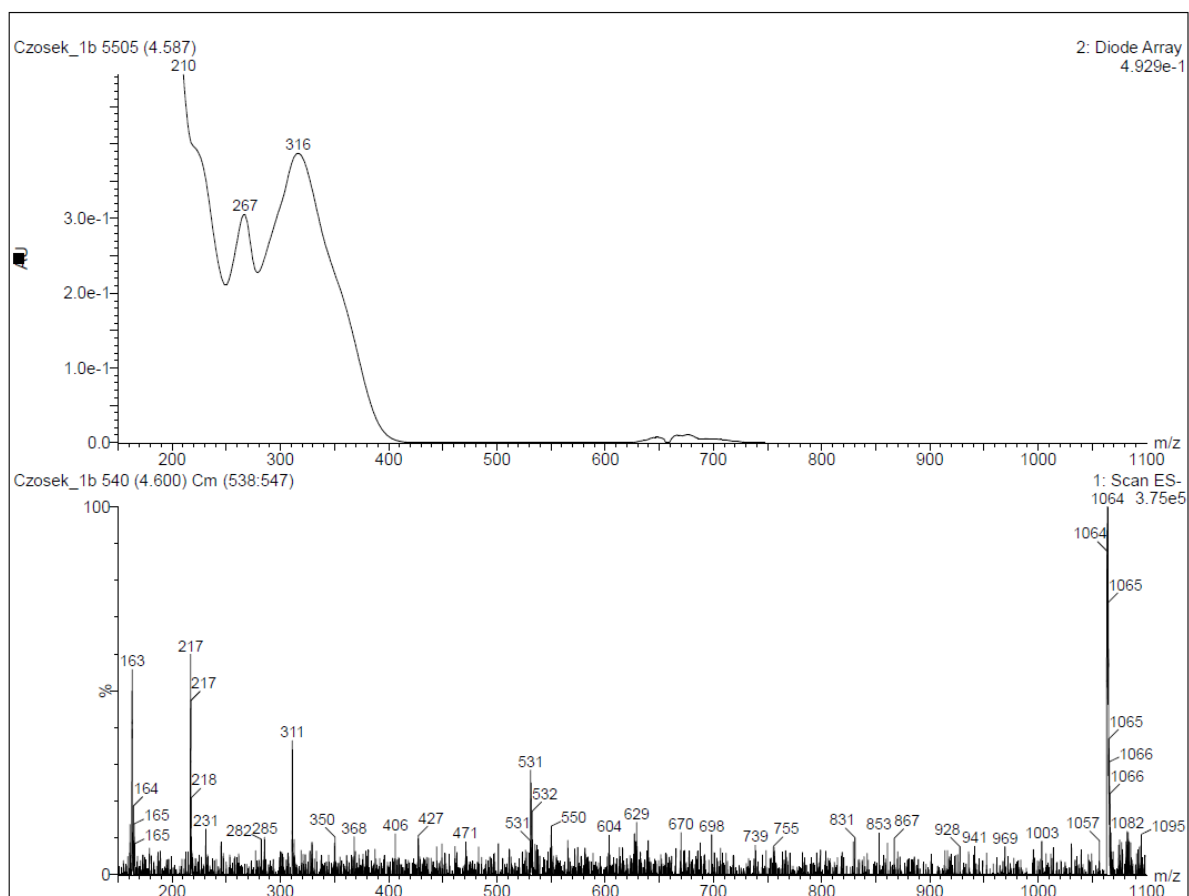

Compound 8

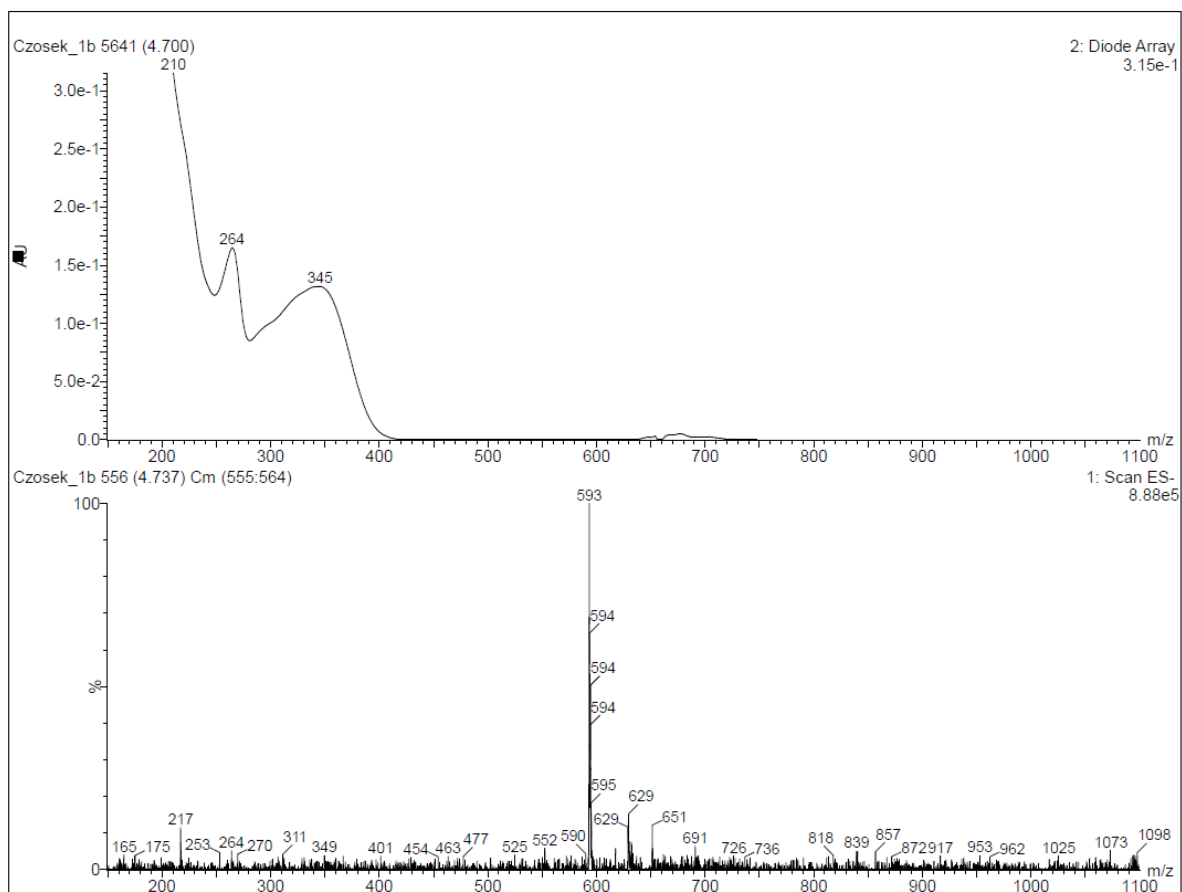

Compound 9

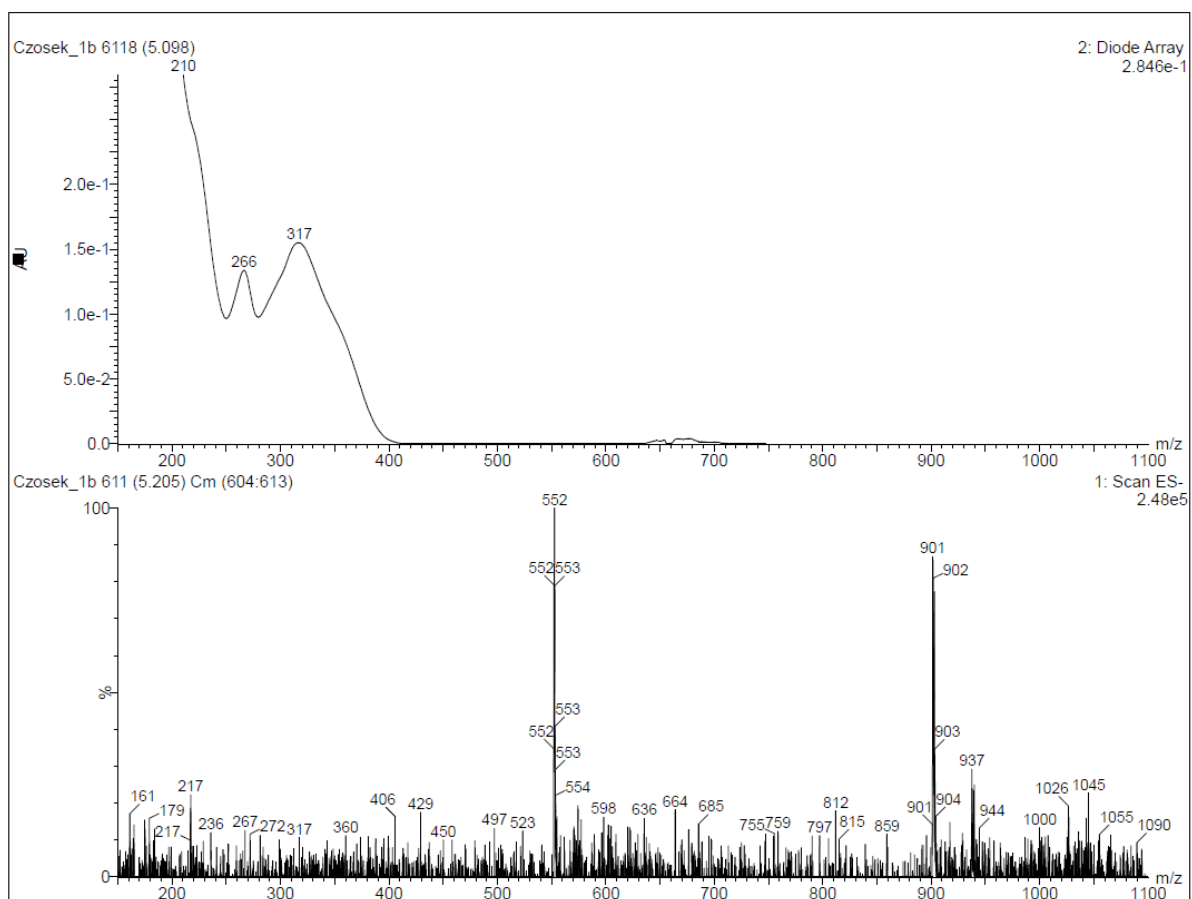

Compound 10

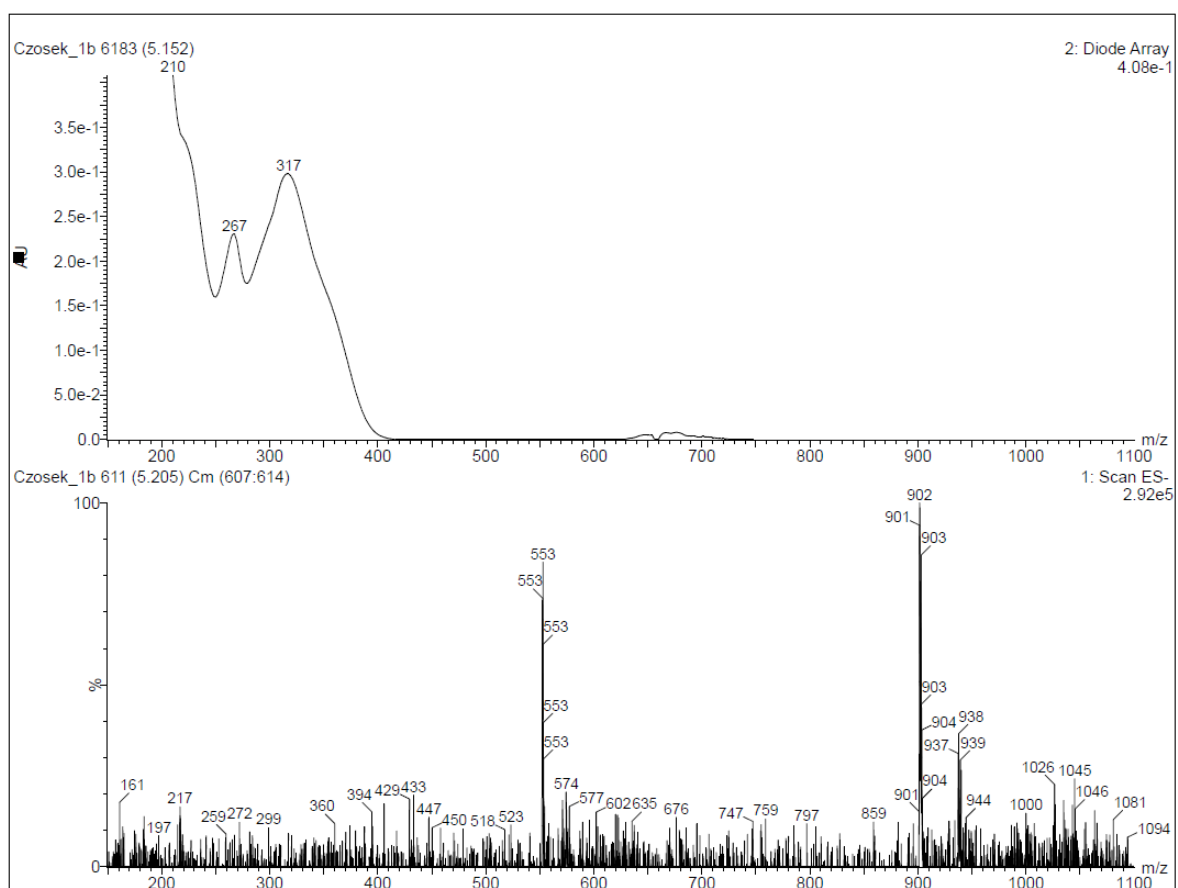

Compound 11

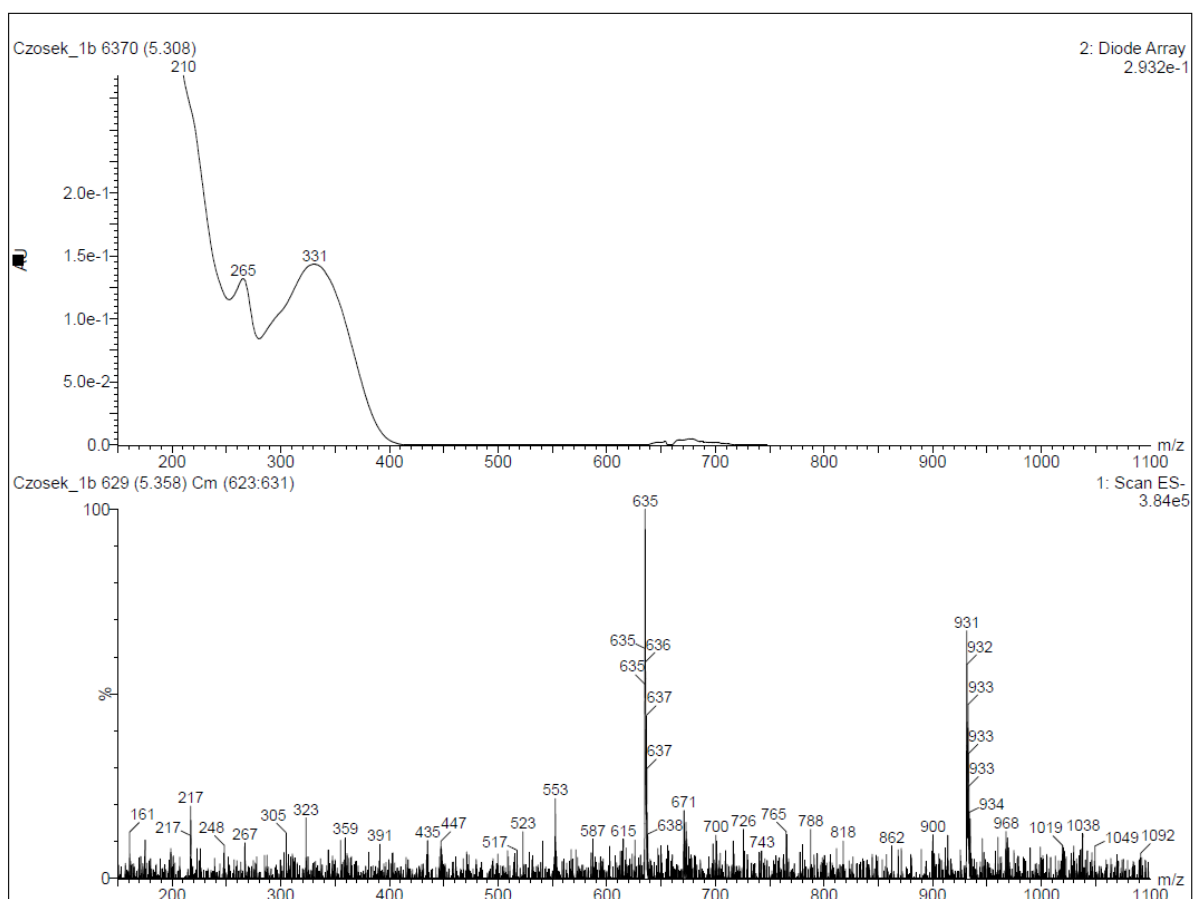

Compound 12

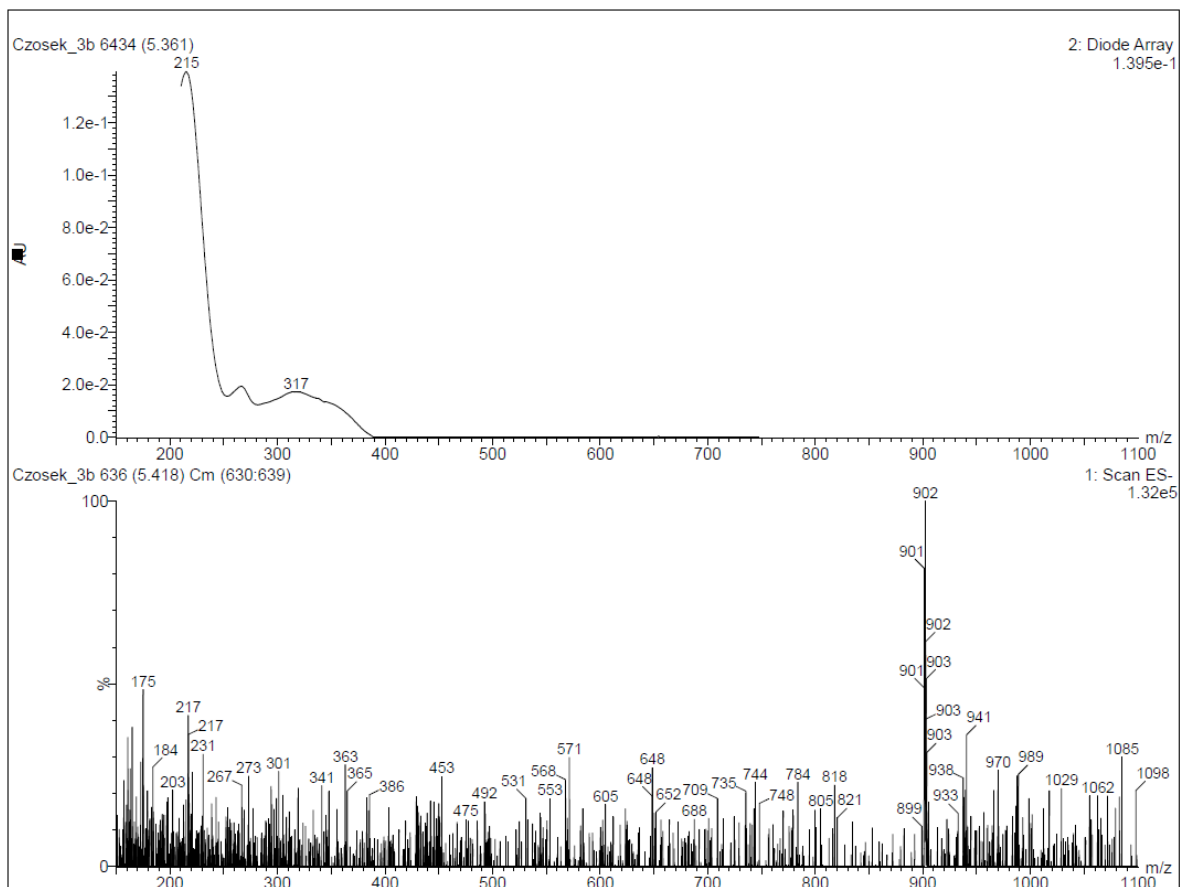

Compound 13

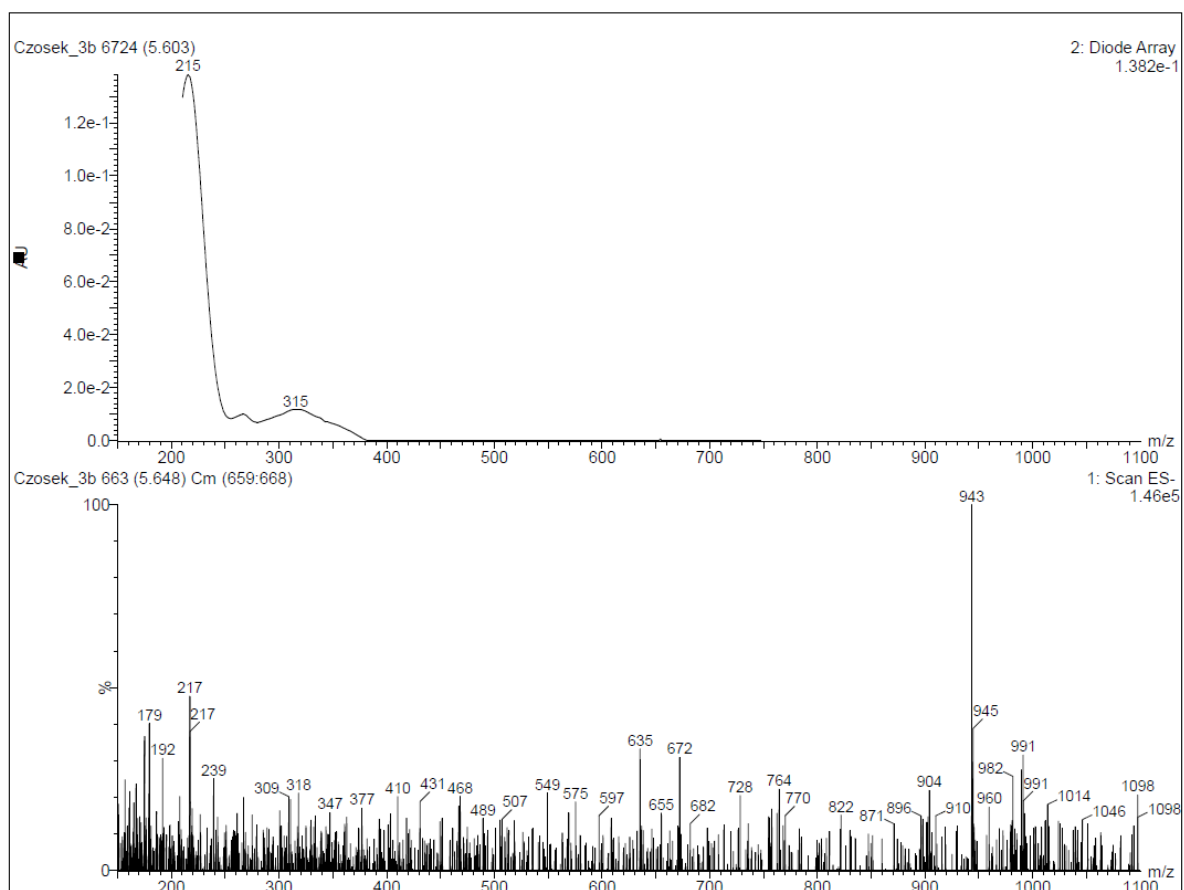

Compound 14

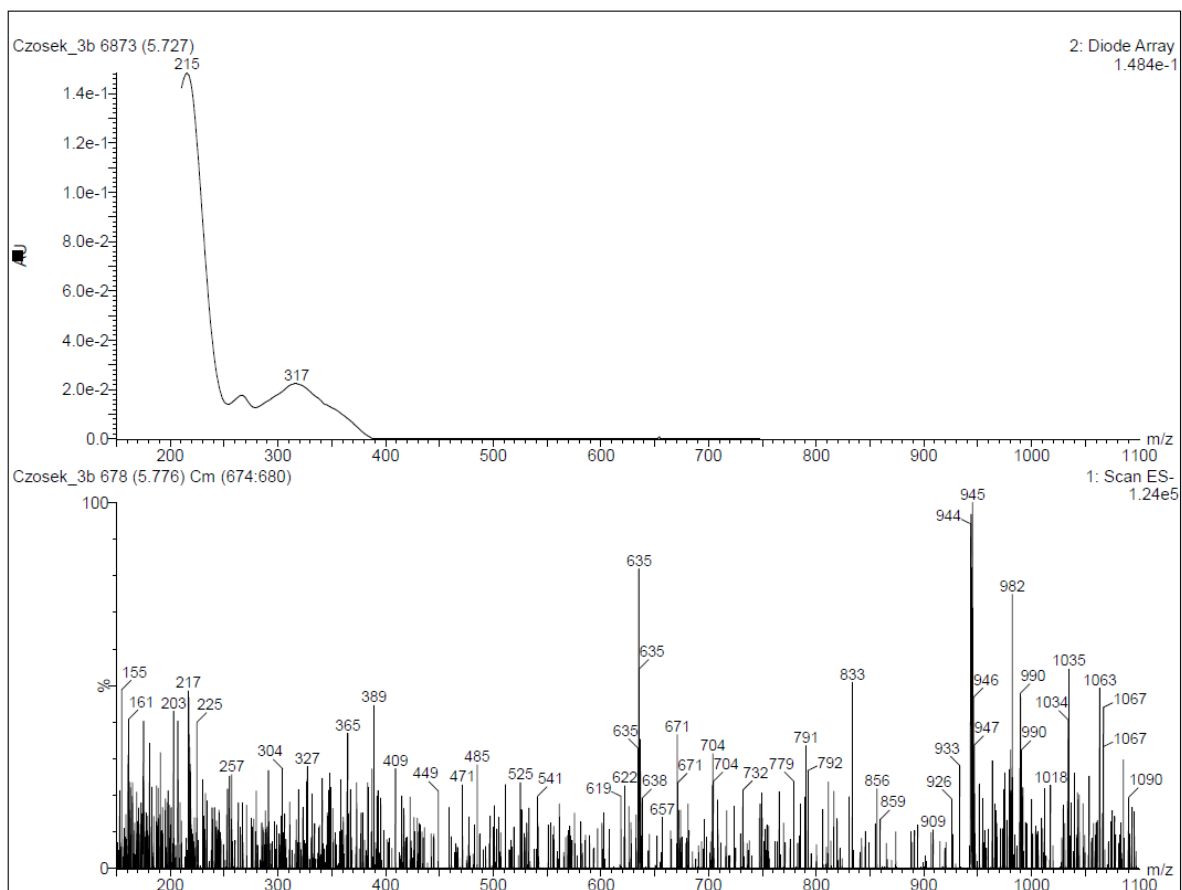

Compound 15

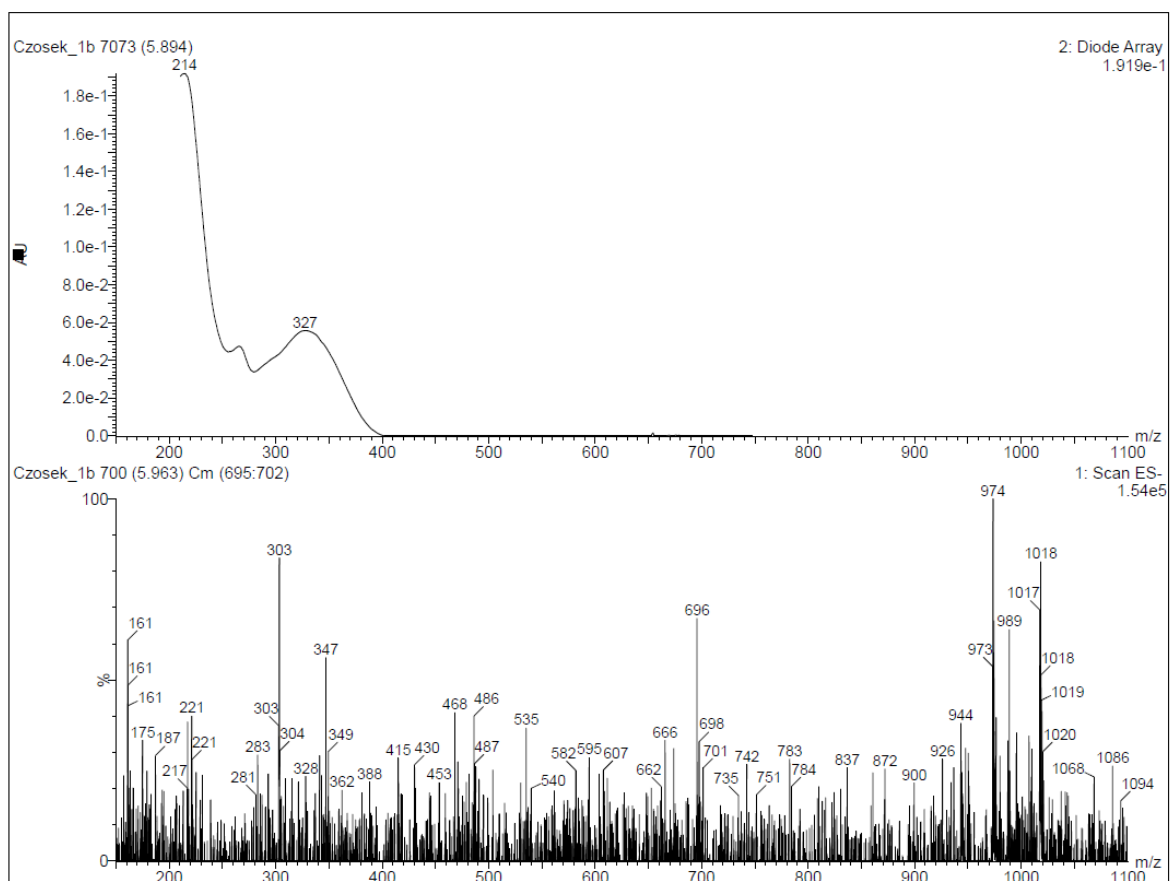

Compound 16
